# Supplementary material for: Metabolomic Profiling of Equine Cord Blood Mesenchymal Stromal Cells in Both Early and Late Stages of Culture
Source: Research Square preprint supplement (doi:10.21203/rs.3.rs-1619662/v1), 2022-05-06
Supplement: Supplementary file 1 [file e4bc410950b91d015bf12893.xlsx]

## Sheet: Sheet1
Plain vs. Late1
Metabolite Family	Metabolite’s Name	P-value	Cells Excreted2	Cells Depleted2
Sphingolipids	14:1SMOH**	0.0004		X
Sphingolipids	16:0SM**	0.017		X
Sphingolipids	16:1SM**	0.028		X
Sphingolipids	16:1SMOH**	0.006		X
Sphingolipids	18:0SM**	0.034		X
Sphingolipids	18:1SM**	0.016		X
Sphingolipids	22:2SMOH	0.02		X
Biogenic amines	alpha-Aminoadipic acid	0.046		X
Others	alpha-ketoglutaric acid*	0.003	X
Amino Acids	Asparagine	0.005	X
Acylcarnitines	C0	0.035		X
Acylcarnitines	C14:2OH**	0.003		X
Acylcarnitines	C16:2OH	0.007	X
Acylcarnitines	C6:1**	0.02	X
Biogenic amines	Carnosine**	0.001	X
Others	Citric acid	0.033	X
Amino Acids	Creatine*	0.037		X
Amino Acids	Glycine	0.007	X
Amino Acids	Histidine**	0.047		X
Amino Acids	Isoleucine**	0.001		X
Others	Lactic acid**	0.023	X
Glycerophospholipids	LYSOC16:0**	0.016		X
Glycerophospholipids	LYSOC16:1**	0.012		X
Glycerophospholipids	LYSOC18:0**	0.008		X
Glycerophospholipids	LYSOC18:1**	0.005		X
Glycerophospholipids	LYSOC18:2**	0.005		X
Glycerophospholipids	LYSOC20:3**	0.008		X
Glycerophospholipids	LYSOC20:4**	0.014		X
Amino Acids	Methionine-Sulfoxide	0.03	X
Amino Acids	Ornithine	0.009	X
Amino Acids	Proline	0.039	X
Biogenic amines	Serotonin	0.0003		X
Others	Trimethylamine N-oxide**	0.006		X
Others	Uric acid	0.007	X
Amino Acids	Valine**	0.003		X
